# Supplementary material
Source: PubMed Central journal article supplement (PMC5900327)
Supplement: ml7b00489_si_001.pdf [file ml7b00489_si_001.pdf]

## SUPPORTING INFORMATION

### MANUMYCIN-A IS A POTENT INHIBITOR OF MAMMALIAN THIOREDOXIN REDUCTASE-1 (TRXR-1)

Anupama Tuladhar and Kathleen S. Rein\*

Department of Chemistry and Biochemistry, Florida International University, 11200 SW 8th Street, Miami, FL 33199, United States

**General:** Manumycin A, deoxymanumycin A and dihydromanumycin A were purchased from Adipogen Life Sciences and used without further purification. Man-A and its derivatives were analyzed by HPLC (LiChrospher 100 RP-8, 5  $\mu$ m column, 4.0 x 250 mm. 50:50 acetonitrile:water, 0.1% TFA, 1 mL/min) with UV detection (Man A 345 nm, dihydro-Man A 345 nm, deoxy-Man A 398 nm). Man A dihydro-Man A and deoxy-Man A were found to be 97%, 92% and 87% pure respectively. Man A and its derivatives were analyzed by HESI MS (Bruker Evo-Q Elite Triple-Quadrupole) operating in positive ion mode and the anticipated  $m/z$  for M+1 was observed in all cases (551.6, 553.6 and 535.6 for Man A, dihydro-Man A and deoxy-Man A respectively). Cytochrome c was purchased from Lee biochemical and superoxide dismutase was purchased from MP Biomedicals. Enzyme assay kit (fluorescent TrxR/Trx) and rat recombinant TrxR-1 were purchased from Cayman Chemical. All other reagents were purchased from Sigma-Aldrich or Fisher Scientific and used without further purification. The TrxR/Trx assay was performed according to the kit manufacturer's instructions with noted exceptions below. UV/Visible and fluorescence measurements were performed in 384 well microplates using a Synergy® 2 (BioTek Instrument, Inc.) or an Infinite® M1000 PRO (Tecan Group Ltd.) microplate reader. All assays were performed in triplicate. Results are presented as an average of three trials  $\pm$  standard deviation. Error limits on graphs represent the standard deviation of three trials.

**TrxR/Trx inhibition assay.** The assay was performed in 384 well black flat bottom plate in a final volume of 100  $\mu$ L. Rat TrxR-1 (10  $\mu$ L, 1  $\mu$ M, 0.2 mg/mL BSA, 50 mM Tris-Cl, 1 mM EDTA pH 7.5) was pre-reduced with NADPH (5  $\mu$ L, 4mg/mL) in the presence of Man-A (in 25% DMSO) final concentrations of 0, 100, 250, 750, and 1000 nM. After 30 minutes, human Trx (10  $\mu$ L, 1  $\mu$ M) was added and incubated for an additional 30 minutes. Fluorescent substrate (20  $\mu$ L, 0.4 mg/ml, eosin labeled bovine insulin) was added to the enzyme/Man-A solution (80  $\mu$ L) to initiate the reaction. The fluorescence was monitored at  $\lambda_{ex}/\lambda_{em}$  = 520nm/545 nm every 5 minutes for 1 hour.

**DTNB reduction assay.** (Method A) *Pre-incubation with Man-A.* The assay was performed in 384 well black flat bottom plate in a final volume of 100  $\mu$ L. Rat recombinant TrxR-1 (100  $\mu$ L, 80 nM) was reduced with NADPH (100  $\mu$ L, 0.1 mM) in 50 mM Tris-HCl, 1 mM EDTA pH 7.5 for 30 minutes at room temperature. Man-A (or its derivatives in 25% DMSO) was added for final concentrations of 0, 5, 50, 500, 1800, 5000 nM. The mixture was incubated for additional sixty minutes at room temperature. DTNB (20  $\mu$ L, 10 mM) in 0.1 M sodium phosphate and 1 mM EDTA, pH 8.0 was added to initiate the reaction. The reduction of DTNB was monitored at 412 nm every 5 minutes for 1 hour. (Method B) *Without pre- incubation with Man-A.* The assay was performed as described above except that Man-A and DTNB were added simultaneously after NADPH reduction of TrxR. All result are expressed as percent of control at termination (60 minutes).

**Time course inhibition of DTNB reduction by TrxR.** The assay was performed in 384 well black flat bottom plate in a final volume of 100  $\mu$ L. Rat recombinant TrxR-1 (100  $\mu$ L, 80 nM) was reduced with NADPH (100  $\mu$ L, 0.1 mM) in 50 mM Tris-HCl, 1 mM EDTA pH 7.5 for 30 minutes at room temperature. Man-A (in 25% DMSO) was added for final concentrations of 1  $\mu$ M and incubated for 15, 10, 5 and 2 min after which DTNB (20  $\mu$ L, 10 mM) in 0.1 M sodium phosphate and 1 mM EDTA, pH 8.0 was added to initiate the reaction. The reduction of DTNB was monitored at 412 nm every 5 minutes for 1 hour.

**Irreversible inhibition of TrxR by Man-A.** In order to determine the reversibility of inhibition by Man-A, TrxR-1 (80  $\mu$ L, 80 nM) was reduced with 0.1 mM NADPH (50 mM Tris-HCl, 1 mM EDTA pH 7.5) for 30 minutes. The reduced TrxR was divided into three samples viz. control (no Man-A), Man-A and Man-A not subjected to gel filtration. A fourth sample of TrxR (80 nM) was not reduced with NADPH. A solution of Man-A (in 25% DMSO) was added to the TrxR samples (280  $\mu$ L) for final concentrations of TrxR (5.2 nM) and Man-A (2  $\mu$ M). The control sample was substituted with equal volume of 25% DMSO instead of Man-A solution. Samples were incubated for 1 hour at ambient temperature, after which they were passed through Micro Bio-spin P-6 gel column of MW limit of 6000 (Bio-Rad). One sample containing Man A was not passed through the gel filtration column. All samples (280  $\mu$ L) were re-reduced with (20  $\mu$ L, 0.1 mM) NADPH for 30 minutes. Finally, the DTNB assay was performed as described above by adding 20  $\mu$ L of 10 mM DTNB to 80  $\mu$ L of reaction mixture and the absorbance was monitored at 412 nm every 5 minutes for 1 hour.

**Reaction of Sel-green probe with Seleno-L-cysteine.** A stock solution of seleno-L-cystine (500  $\mu$ L, 156  $\mu$ M) was reduced with 1.5 equivalent of immobilized TCEP ( $>8$   $\mu$ mol/mL) for 1 hour. After reduction, the immobilized TCEP was removed by centrifugation at 14, 000 X g, for 10 minutes. The reduced L-selenocystiene (20  $\mu$ L, 312  $\mu$ M) was incubated with Man-A, deoxy-Man-A or dihydro-Man-A (10  $\mu$ L, 625  $\mu$ M) for 1 hour. Sel-green (20  $\mu$ L, 100  $\mu$ M) was added and fluorescence monitored at  $\lambda_{ex}/\lambda_{em}$  = 370 nm/510 nm every 5 minutes for 1 hour.

**NADPH consumption by TrxR in the presence of Man-A on.** The assay was performed in 384 well black flat bottom plate in a final volume of 100  $\mu$ L. Rat recombinant TrxR-1 (10  $\mu$ L, 2  $\mu$ M) and Man-A (2.5  $\mu$ L, 2.5 mM) was added in the final volume of 100  $\mu$ L in assay

buffer (50 mM Tris-HCl, 1 mM EDTA pH 7.5). NADPH (7.5  $\mu$ L, 2.68 mM) was added and the absorbance was monitored at 340 nm for 30 minutes.

**Superoxide radical anion production by TrxR in the presence of Man A.** The NADPH oxidase activity induced by Man-A was determined by monitoring the reduction of cytochrome c. The assay was performed in 384 well black flat bottom plate in a final volume of 100  $\mu$ L. Cytochrome c (10  $\mu$ L, 1  $\mu$ M) NADPH (7.5  $\mu$ L, 2.68 mM), Man-A (2.5  $\mu$ L, 2.5 mM/DMSO) or 2.5  $\mu$ L DMSO were combined. The reaction was initiated by addition of rat TrxR-1 (10  $\mu$ L, 1  $\mu$ M). The production of superoxide was confirmed by addition of 6 units SOD/well in parallel samples. SOD is used to quench superoxide generated by TrxR. The reduction of cytochrome C was measured at 550 nm.

**Preparation of cell lysate for biochemical assays.** The human lymphoblast cell line (GM02152) was purchased from Coriell institute. Cells were cultured in Roswell Park Memorial Institute (RPMI) 1640 medium supplemented with 15 % bovine serum (FBS) and 2  $\mu$ M sodium selenite and were maintained in a humidified incubator at 37°C and 5% CO<sub>2</sub> until they reach log phase.

For TrxR/Trx assay GM02152 cells were seeded in 75 cm<sup>2</sup> flasks containing growth medium. The cells were harvested by centrifugation (720 X g, 4 minutes) when log phase was reached. The cells were lysed by addition of 100  $\mu$ L lysis buffer (10 mM Tris-HCl, 200 mM KCl, 2 mM EDTA, 40% glycerol, 0.2% TritonX-100, pH 7.5) by rotation at 4°C for 2 hours. Cellular debris was removed by centrifugation at 17000 X g at 4°C for 30 minutes. Protein concentration of the lysate was determined by the Bradford method using Coomassie protein assay reagent in triplicate. Typical concentration of the lysate ranged from 10-15 mg/ml.

**TrxR/Trx inhibition assay with cell lysate.** The assay was performed in 384 well black flat bottom plate in a final volume of. 100  $\mu$ L. Cell lysate (15.6  $\mu$ g in lysis buffer) was reduced with NADPH (5  $\mu$ L, 4 mg/ml). Man-A (in 25% DMSO) was added to a final concentration of 1  $\mu$ M. After 30 minutes, human Trx (10  $\mu$ L, 1  $\mu$ M) was added and incubated for an additional 30 minutes. Fluorescent substrate (20  $\mu$ L, 0.4 mg/ml, eosin labeled bovine insulin) was added to the enzyme/Man-A solution (80  $\mu$ L) to initiate the reaction.. The fluorescence was monitored at  $\lambda_{ex}/\lambda_{em}$ = 520nm/545 nm every 5 minutes for 1 hour.

## LIST OF ABBREVIATION

|               |                                                               |
|---------------|---------------------------------------------------------------|
| Man A         | Manumycin A                                                   |
| Deoxy-Man A   | Deoxymanumycin A                                              |
| Dihydro-Man A | Dihydromanumycin A                                            |
| FTase         | Farnesyl transferase                                          |
| TrxR1         | Mammalian cytosolic thioredoxin reductase 1                   |
| NADPH         | Nicotinamide adenine dinucleotide phosphate                   |
| SecTRAP       | Selenium compromised thioredoxin reductase apoptotic proteins |
| Trx           | Thioredoxin                                                   |
| FAD           | Flavin adenine dinucleotide                                   |
| ROS           | Reactive oxygen species                                       |
| DTNB          | 5,5'-dithio-bis-(2-nitrobenzoic acid)                         |
| amu           | atomic mass unit                                              |
| SOD           | Superoxide dismutase                                          |
| TCEP          | Tris(2-carboxyethyl)phosphine                                 |
| Tris          | <i>tris</i> (hydroxymethyl)aminomethane                       |
| MW            | Molecular weight                                              |
| BSA           | Bovine serum albumin                                          |

DMSO      Dimethyl sulfoxide

GM02152 cells   Human lymphoblast cell line
